# Supplementary material for: Extracting lignin from sugarcane bagasse for methylene blue and hexavalent chromium adsorption in textile wastewater: a facile, green, and sustainable approach
Source: Royal Society of Chemistry journal article supplement (doi:10.1039/d3ra08007b), 2024-01-01
Supplement: d3ra08007b1.pdf [file d3ra08007b1.pdf]

## Supplementary Information

### Extracted lignin from sugarcane bagasse for methylene blue and hexavalent chromium adsorption in textile wastewater: Facile, green and sustainable approach

**Nhu Y Nguyen-Thi**<sup>a\*</sup>, **Cuong Quoc Nguyen**<sup>b</sup>, **Quang Le Dang**<sup>c</sup>, **Quang De Tran**<sup>b</sup>, **Tuyet Nhung Do-Thi**<sup>a</sup>, and **Luong Huynh Vu Thanh**<sup>d\*</sup>

<sup>a</sup>*Can Tho University of Technology, Can Tho 94000, Viet Nam.*

<sup>b</sup>*Department of Chemistry, College of Natural Sciences, Can Tho University, Can Tho 94000, Vietnam*

<sup>c</sup>*Institute for Tropical Technology, Vietnam Academy of Science and Technology, Hanoi 10072, Vietnam*

<sup>d</sup>*Department of Chemical Engineering, College of Engineering, Can Tho University, Can Tho 94000, Viet Nam.*

**Keywords:** adsorption, chromium, green chemistry, lignin, methylene blue, sugarcane bagasse

#### **\*Author for correspondence**

**Nhu Y Nguyen-Thi:** ntny@ctu.edu.vn; Tel. +84-909163385.

**Luong Huynh Vu Thanh:** lhvthanh@ctu.edu.vn).

†These authors contributed equally to this work

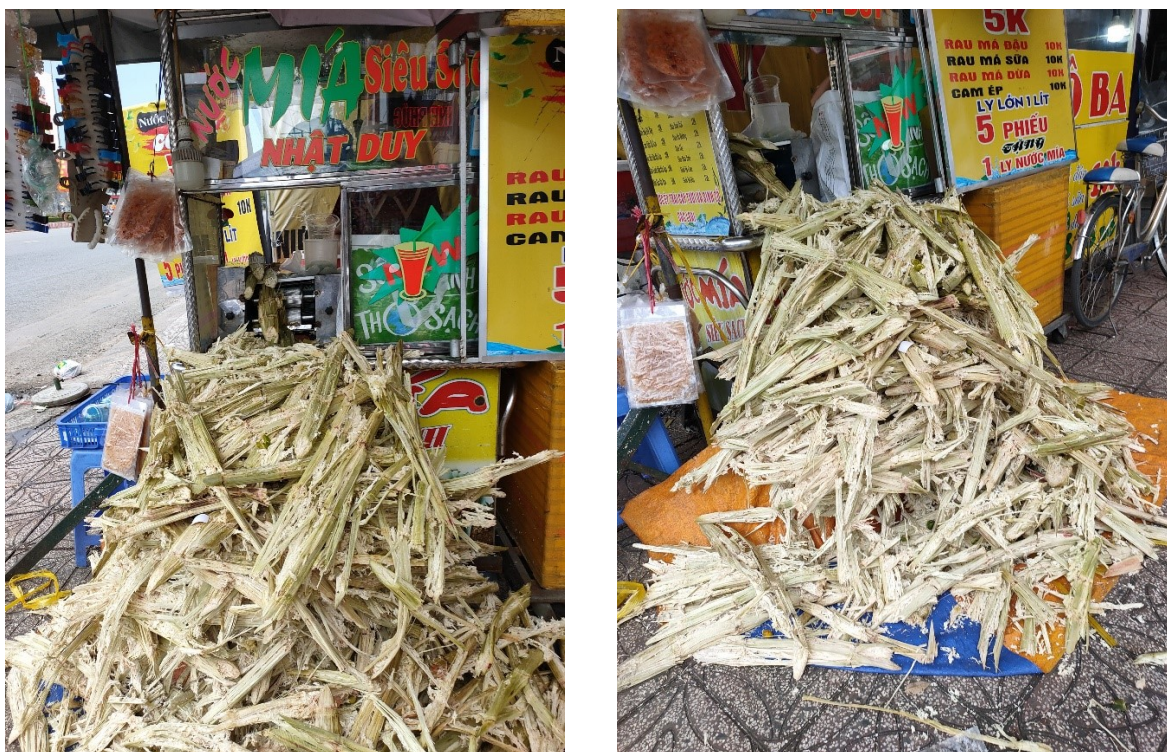

**Fig. S1.** Natural biomass resources (sugarcane bagasse, SCB) were collected

### **The optimum extraction process of lignin from sugarcane baits**

The work presented the process of extracting lignin from sugarcane bagasses collected in the Mekong Delta, Vietnam by alkali method.

Sugarcane bagasse was chopped into particles of around 1 cm<sup>2</sup> and boiled in distilled water at 70°C for 2 hrs to remove sugar. After that, the SCB was dried at 60°C for 24 hrs and crushed to approximately 0.5 mm<sup>2</sup>. The crushed SCB is treated with NaOH solution (10 %) at 120°C for 90 mins, then solid was removed to obtain black solution. Next, concentrated H<sub>2</sub>SO<sub>4</sub> was slowly added into the black solution to form yellow precipitant until the solution reached pH 2. Then the precipitate several times with deionized water and dry the precipitate at 60°C for 24 hrs to obtain lignin. The results indicate that sugarcane bagasse yielded the lignin content of 38.61%.

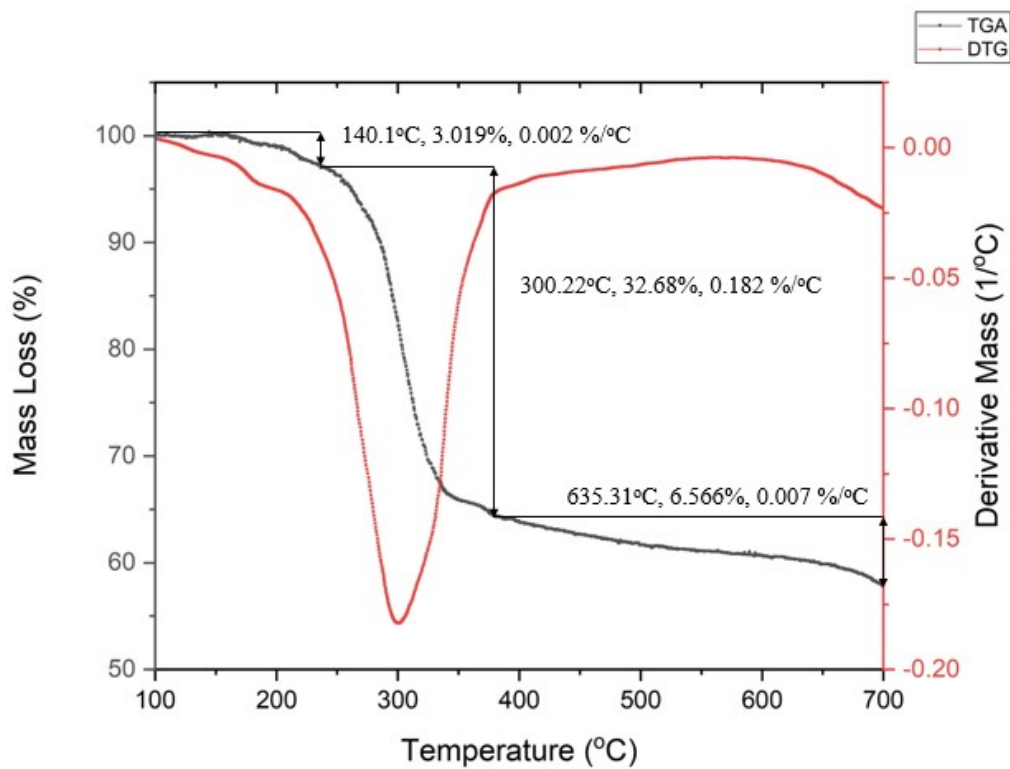

Figure S2. TGA of lignin powder was boiled for 60 minutes

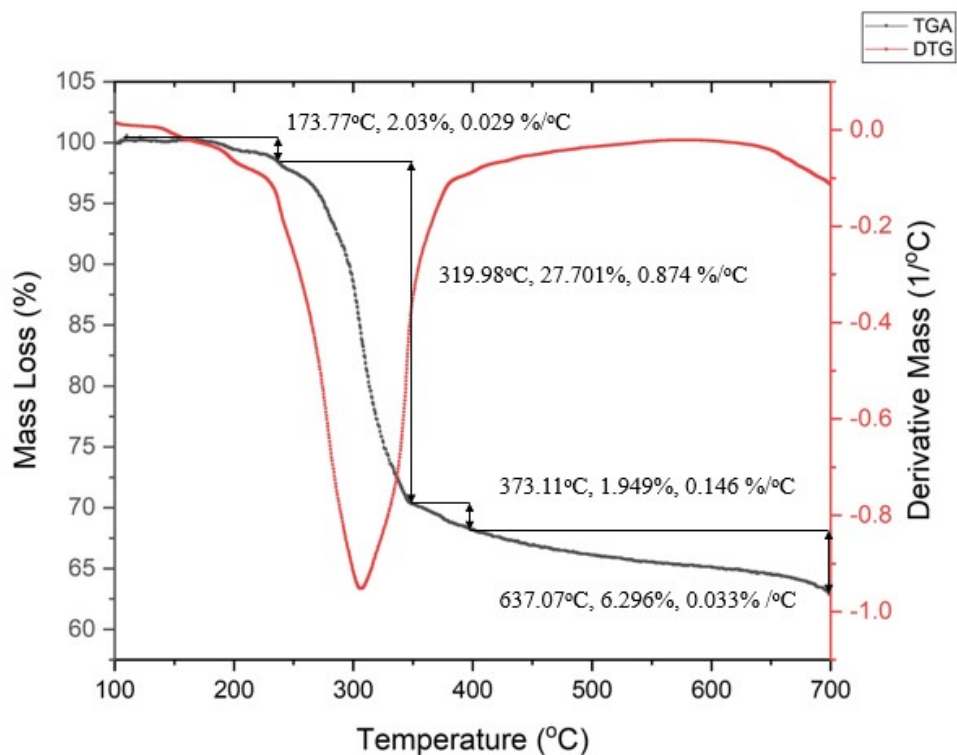

Figure S3. TGA of lignin powder was boiled for 90 minutes

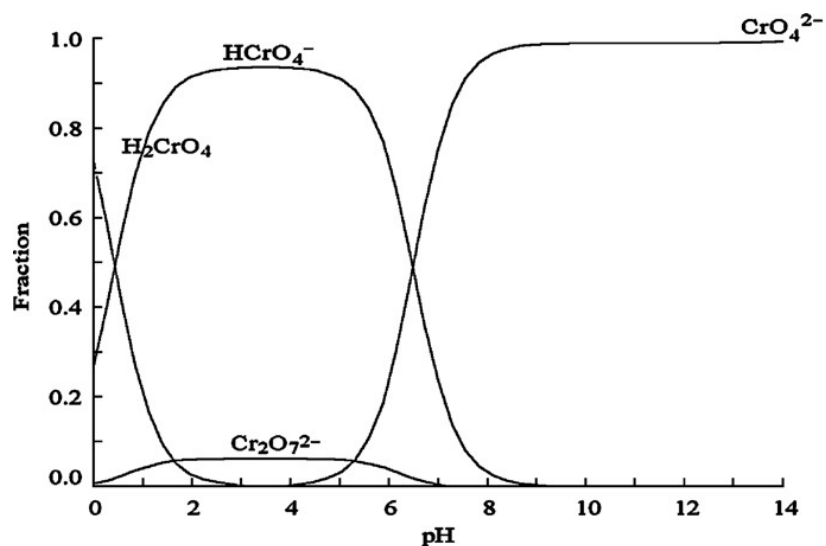

Figure S4 The dissociation of Cr(VI) in solution depends on pH

## References

- [1] C.V. Gherasim, G. Bourceanu, R. Olariu, Cecilia, Arsene, A novel polymer inclusion membrane applied in chromium (VI) separation from aqueous solutions, *Hazardous materials* 197 (2011) 244-253.
